# Supplementary material for: Polycatenar pyrazole and pyrazolate ligands as building blocks of new columnar Pd(ii) metallomesogens
Source: Royal Society of Chemistry journal article supplement (doi:10.1039/c4dt00369a), 2014-01-01

## Polycatenar pyrazole and pyrazolate ligands as building blocks of new columnar Pd(II) metallomesogens

Cristián Cuerva,<sup>a</sup> José A. Campo,<sup>a</sup> Paloma Ovejero,<sup>a</sup> María R. Torres<sup>b</sup> and Mercedes Cano<sup>\*a</sup>

<sup>a</sup> Departamento de Química Inorgánica I, Facultad de Ciencias Químicas, Universidad Complutense, E-28040 Madrid, Spain

<sup>b</sup> Laboratorio de Difracción de Rayos-X, Facultad de Ciencias Químicas, Universidad Complutense, E-28040 Madrid, Spain

### Corresponding Author

\* E-mail: mmcano@ucm.es; Fax: +34 91394 4352; Tel: +34 91394 4340

### Characterisation of 3-(3,5-bis(alkyloxy)phenyl)-5-(2-pyridin-2-yl)pyrazole [Hpz<sup>R(n,n)</sup>py] (R(n,n) = C<sub>6</sub>H<sub>3</sub>(OC<sub>n</sub>H<sub>2n+1</sub>)<sub>2</sub>; n = 4, 8, 10, 14, 16, 18) (1-8)

**[Hpz<sup>R(4,4)</sup>py] (1):** colourless solid (71%). Found: C, 72.3; H, 7.4; N, 11.5. C<sub>22</sub>N<sub>3</sub>H<sub>27</sub>O<sub>2</sub> requires C, 72.1 H, 7.3; N, 11.5%.  $\nu_{\max}/\text{cm}^{-1}$  3144, 3104w  $\nu(\text{N-H})$ , 1595s  $\nu(\text{C=C} + \text{C=N})$ , 779m  $\gamma(\text{C-H})_{\text{py}}$ .  $\delta_{\text{H}}$  (300 MHz; CDCl<sub>3</sub>; Me<sub>4</sub>Si): 0.98 (6H, t, <sup>3</sup>J 7.4, CH<sub>3</sub>), 1.51 (4H, m, CH<sub>2</sub>), 1.76 (4H, qt, <sup>3</sup>J 6.6, CH<sub>2</sub>), 4.02 (4H, t, <sup>3</sup>J 6.6, OCH<sub>2</sub>), 6.46 (1H, t, <sup>4</sup>J 2.3, H<sub>p</sub>), 6.99 (2H, d, <sup>4</sup>J 2.2, H<sub>o</sub>), 7.03 (1H, s, 4'-H), 7.26 (1H, m, 5-H), 7.77 (1H, m, 3-H), 7.77 (1H, m, 4-H), 8.65 (1H, d, <sup>3</sup>J 4.7, 6-H).  $\delta_{\text{C}}$  (75.48 MHz; CDCl<sub>3</sub>; Me<sub>4</sub>Si): 13.8 (CH<sub>3</sub>), 19.2 (CH<sub>2</sub>), 31.3 (CH<sub>2</sub>), 67.8 (OCH<sub>2</sub>), 100.7 (C-4'), 101.4 (C<sub>p</sub>), 104.2 (C<sub>o</sub>), 120.1 (C-3), 122.8 (C-5), 134.2 (C<sub>i</sub>), 137.0 (C-4), 144.8 (C-3'), 148.7 (C-2), 149.4 (C-6), 151.4 (C-5'), 160.6 (C<sub>m</sub>).

**[Hpz<sup>R(8,8)</sup>py] (3):** colourless solid (68%). Found: C, 75.4; H, 9.0; N, 8.8. C<sub>30</sub>N<sub>3</sub>H<sub>43</sub>O<sub>2</sub> requires C, 75.1 H, 8.7; N, 8.8%.  $\nu_{\max}/\text{cm}^{-1}$  3212w  $\nu(\text{N-H})$ , 1589s  $\nu(\text{C=C} + \text{C=N})$ , 791m  $\gamma(\text{C-H})_{\text{py}}$ .  $\delta_{\text{H}}$  (300 MHz; CDCl<sub>3</sub>; Me<sub>4</sub>Si): 0.88 (6H, t, <sup>3</sup>J 7.0, CH<sub>3</sub>), 1.30 (16H, m, CH<sub>2</sub>), 1.47 (4H, m, CH<sub>2</sub>), 1.79 (4H, m, CH<sub>2</sub>), 4.00 (4H, t, <sup>3</sup>J 6.6, OCH<sub>2</sub>), 6.46 (1H, t, <sup>4</sup>J 2.1, H<sub>p</sub>), 6.99 (2H, d, <sup>4</sup>J 2.2, H<sub>o</sub>), 7.03 (1H, s, 4'-H), 7.26 (1H, m, 5-H), 7.77 (1H, m, 3-H), 7.77 (1H, m, 4-H), 8.63 (1H, d, <sup>3</sup>J 4.6, 6-H).  $\delta_{\text{C}}$  (75.48 MHz; CDCl<sub>3</sub>; Me<sub>4</sub>Si): 14.0 (CH<sub>3</sub>), 22.6 (CH<sub>2</sub>), 25.0 (CH<sub>2</sub>), 29.2 (CH<sub>2</sub>), 29.3 (CH<sub>2</sub>), 29.3 (CH<sub>2</sub>), 31.8 (CH<sub>2</sub>), 68.1 (OCH<sub>2</sub>), 100.7 (C-4'), 101.4 (C<sub>p</sub>), 104.1 (C<sub>o</sub>), 120.1 (C-3), 122.7 (C-5), 134.2 (C<sub>i</sub>), 136.9 (C-4), 144.9 (C-3'), 148.8 (C-2), 149.4 (C-6), 151.1 (C-5'), 160.6 (C<sub>m</sub>).

**[Hpz<sup>R(10,10)</sup>py] (4):** colourless solid (66%). Found: C, 75.9; H, 9.7; N, 7.6. C<sub>34</sub>N<sub>3</sub>H<sub>51</sub>O<sub>2</sub>·0.3EtOH requires C, 76.1 H, 9.4; N, 7.0%.  $\nu_{\max}/\text{cm}^{-1}$  3245w  $\nu(\text{N-H})$ , 1597s  $\nu(\text{C=C} + \text{C=N})$ , 778m  $\gamma(\text{C-H})_{\text{py}}$ .  $\delta_{\text{H}}$  (300 MHz; CDCl<sub>3</sub>; Me<sub>4</sub>Si): 0.89 (6H, t, <sup>3</sup>J 7.0, CH<sub>3</sub>), 1.24 (t, <sup>3</sup>J 7.0, EtOH), 1.27 (28H, m, CH<sub>2</sub>), 1.79 (4H, qt, <sup>3</sup>J 6.6, CH<sub>2</sub>), 3.72 (q, <sup>3</sup>J 7.0, EtOH), 4.00 (4H, t, <sup>3</sup>J 6.3, OCH<sub>2</sub>), 6.46 (1H, t, <sup>4</sup>J 2.2, H<sub>p</sub>), 6.99 (2H, d, <sup>4</sup>J 2.1, H<sub>o</sub>), 7.03 (1H, s, 4'-H), 7.26 (1H, m, 5-H), 7.77 (1H, m, 3-H), 7.77 (1H, m, 4-H), 8.65 (1H, d, <sup>3</sup>J 4.7, 6-H).  $\delta_{\text{C}}$  (75.48 MHz; CDCl<sub>3</sub>; Me<sub>4</sub>Si): 14.1 (CH<sub>3</sub>), 22.6-31.9 (CH<sub>2</sub>), 68.0 (OCH<sub>2</sub>), 100.7 (C-4'), 101.3 (C<sub>p</sub>), 104.0 (C<sub>o</sub>), 120.1 (C-3), 122.7 (C-5), 134.0 (C<sub>i</sub>), 137.0 (C-4), 145.0 (C-3'), 148.8 (C-2), 149.3 (C-6), 151.0 (C-5'), 160.5 (C<sub>m</sub>).

**[Hpz<sup>R(14,14)</sup>py] (6):** colourless solid (78%). Found: C, 77.5; H, 10.5; N, 6.4. C<sub>42</sub>N<sub>3</sub>H<sub>67</sub>O<sub>2</sub>·0.3EtOH requires C, 77.3 H, 10.0; N, 6.2%.  $\nu_{\max}/\text{cm}^{-1}$  3218w  $\nu(\text{N-H})$ , 1594s  $\nu(\text{C=C} + \text{C=N})$ , 779m  $\gamma(\text{C-H})_{\text{py}}$ .  $\delta_{\text{H}}$  (300 MHz; CDCl<sub>3</sub>; Me<sub>4</sub>Si): 0.88 (6H, t, <sup>3</sup>J 6.9, CH<sub>3</sub>), 1.26 (44H, m, CH<sub>2</sub>), 1.26 (m, EtOH) 1.79 (4H, qt, <sup>3</sup>J 6.4, CH<sub>2</sub>), 3.73 (q, <sup>3</sup>J 7.0, EtOH), 4.00 (4H, t, <sup>3</sup>J 6.4, OCH<sub>2</sub>), 6.46 (1H, t, <sup>4</sup>J 2.1, H<sub>p</sub>), 6.98 (2H, d, <sup>4</sup>J 2.1, H<sub>o</sub>), 7.02 (1H, s, 4'-H), 7.26 (1H, m, 5-H), 7.73 (1H, d, <sup>3</sup>J 7.7, 3-H), 7.77 (1H, ddd, <sup>3</sup>J 7.9, 7.7, <sup>4</sup>J 1.6, 4-H), 8.64 (1H, d, <sup>3</sup>J 4.6, 6-H).  $\delta_{\text{C}}$  (75.48 MHz; CDCl<sub>3</sub>; Me<sub>4</sub>Si): 14.1 (CH<sub>3</sub>), 22.7-31.9 (CH<sub>2</sub>), 68.0 (OCH<sub>2</sub>), 100.7 (C-4'), 101.3 (C<sub>p</sub>), 104.0 (C<sub>o</sub>), 120.0 (C-3), 122.7 (C-5), 134.1 (C<sub>i</sub>), 136.9 (C-4), 144.8 (C-3'), 148.7 (C-2), 149.4 (C-6), 151.2 (C-5'), 160.5 (C<sub>m</sub>).

**[Hpz<sup>R(16,16)</sup>py] (7):** colourless solid (63%). Found: C, 78.0; H, 10.8; N, 5.8. C<sub>46</sub>N<sub>3</sub>H<sub>75</sub>O<sub>2</sub>·0.4EtOH requires C, 78.2 H, 10.4; N, 5.5%.  $\nu_{\max}/\text{cm}^{-1}$  3219w  $\nu(\text{N-H})$ , 1596s  $\nu(\text{C=C} + \text{C=N})$ , 776m  $\gamma(\text{C-H})_{\text{py}}$ .  $\delta_{\text{H}}$  (300 MHz; CDCl<sub>3</sub>; Me<sub>4</sub>Si): 0.87 (6H, t, <sup>3</sup>J 6.9, CH<sub>3</sub>), 1.26 (52H, m, CH<sub>2</sub>), 1.26 (m, EtOH) 1.79 (4H, qt, <sup>3</sup>J 6.2, CH<sub>2</sub>), 3.73 (q, <sup>3</sup>J 7.0, EtOH), 4.00 (4H, t, <sup>3</sup>J 6.5, OCH<sub>2</sub>), 6.46 (1H, t, <sup>4</sup>J 2.2, H<sub>p</sub>), 6.98 (2H, d, <sup>4</sup>J 2.2, H<sub>o</sub>), 7.03 (1H, s, 4'-H), 7.26 (1H, m, 5-H), 7.73 (1H, d, <sup>3</sup>J 7.7, 3-H), 7.77 (1H, ddd, <sup>3</sup>J 7.9, 7.7, <sup>4</sup>J 1.6, 4-H), 8.65 (1H, d, <sup>3</sup>J 4.6, 6-H).  $\delta_{\text{C}}$  (75.48 MHz; CDCl<sub>3</sub>; Me<sub>4</sub>Si): 14.1 (CH<sub>3</sub>), 22.7-31.9 (CH<sub>2</sub>), 68.1 (OCH<sub>2</sub>), 100.6 (C-4'), 101.3 (C<sub>p</sub>), 104.1 (C<sub>o</sub>), 120.1 (C-3), 123.0 (C-5), 134.2 (C<sub>i</sub>), 137.0 (C-4), 144.5 (C-3'), 148.5 (C-2), 149.4 (C-6), 151.6 (C-5'), 160.6 (C<sub>m</sub>).

**[Hpz<sup>R(18,18)py</sup>] (8):** colourless solid (71%). Found: C, 77.9; H, 11.1; N, 5.2. C<sub>50</sub>N<sub>3</sub>H<sub>83</sub>O<sub>2</sub>·0.8EtOH requires C, 78.2; H, 10.5; N, 4.9%.  $\nu_{\max}/\text{cm}^{-1}$  3147, 3100w  $\nu(\text{N-H})$ , 1594s  $\nu(\text{C=C} + \text{C=N})$ , 778m  $\gamma(\text{C-H})_{\text{py}}$ .  $\delta_{\text{H}}$  (300 MHz; CDCl<sub>3</sub>; Me<sub>4</sub>Si): 0.87 (6H, t, <sup>3</sup>J 6.8, CH<sub>3</sub>), 1.23 (t, <sup>3</sup>J 7.0, EtOH), 1.26 (60H, m, CH<sub>2</sub>), 1.78 (4H, m, CH<sub>2</sub>), 3.72 (q, <sup>3</sup>J 7.0 EtOH), 4.00 (4H, t, <sup>3</sup>J 6.4, OCH<sub>2</sub>), 6.44 (1H, t, <sup>4</sup>J 2.1, H<sub>p</sub>), 6.97 (2H, d, <sup>4</sup>J 2.1, H<sub>o</sub>), 7.01 (1H, s, 4'-H), 7.26 (1H, m, 5-H), 7.71 (1H, d, <sup>3</sup>J 7.8, 3-H), 7.76 (1H, ddd, <sup>3</sup>J 7.9, 7.8, <sup>4</sup>J 1.6, 4-H), 8.61 (1H, d, <sup>3</sup>J 4.6, 6-H).  $\delta_{\text{C}}$  (75.48 MHz; CDCl<sub>3</sub>; Me<sub>4</sub>Si): 14.2 (CH<sub>3</sub>), 22.7-31.9 (CH<sub>2</sub>), 68.1 (OCH<sub>2</sub>), 100.7 (C-4'), 101.4 (C<sub>p</sub>), 104.0 (C<sub>o</sub>), 120.1 (C-3), 123.0 (C-5), 134.0 (C<sub>i</sub>), 137.1 (C-4), 144.5 (C-3'), 148.5 (C-2), 149.4 (C-6), 151.4 (C-5'), 160.6 (C<sub>m</sub>).

#### Characterisation of the complexes [Pd(pz<sup>R(n,n)py</sup>)<sub>2</sub>] (R(n,n) = C<sub>6</sub>H<sub>3</sub>(OC<sub>n</sub>H<sub>2n+1</sub>)<sub>2</sub>; n = 4, 8, 10, 14, 16, 18) (9-16)

**[Pd(pz<sup>R(4,4)py</sup>)<sub>2</sub>] (9):** yellow solid (56%). Found: C, 63.3; H, 6.3; N, 10.1. PdC<sub>44</sub>N<sub>6</sub>H<sub>52</sub>O<sub>4</sub> requires C, 63.0; H, 6.3; N, 10.1%.  $\nu_{\max}/\text{cm}^{-1}$  1591s  $\nu(\text{C=C} + \text{C=N})$ , 752m  $\gamma(\text{C-H})_{\text{py}}$ .  $\delta_{\text{H}}$  (300 MHz; CDCl<sub>3</sub>; Me<sub>4</sub>Si): 1.00 (12H, t, <sup>3</sup>J 7.4, CH<sub>3</sub>), 1.57 (8H, m, CH<sub>2</sub>), 1.83 (8H, qt, <sup>3</sup>J 6.7, CH<sub>2</sub>), 4.06 (8H, t, <sup>3</sup>J 6.6, OCH<sub>2</sub>), 6.42 (2H, t, <sup>4</sup>J 2.2, H<sub>p</sub>), 6.80 (2H, s, 4'-H), 7.05 (4H, d, <sup>4</sup>J 2.3, H<sub>o</sub>), 7.13 (2H, ddd, <sup>3</sup>J 7.6, 5.6, <sup>4</sup>J 1.2, 5-H), 7.45 (2H, d, <sup>3</sup>J 7.8, 3-H), 7.70 (2H, ddd, <sup>3</sup>J 7.6, 7.8, <sup>4</sup>J 1.3, 4-H), 10.24 (2H, d, <sup>3</sup>J 5.6, 6-H).

**[Pd(pz<sup>R(8,8)py</sup>)<sub>2</sub>] (11):** yellow solid (62%). Found: C, 68.0; H, 8.0; N, 7.9. PdC<sub>60</sub>N<sub>6</sub>H<sub>84</sub>O<sub>4</sub> requires C, 67.9; H, 7.9; N, 8.0%.  $\nu_{\max}/\text{cm}^{-1}$  1590s  $\nu(\text{C=C} + \text{C=N})$ , 755m  $\gamma(\text{C-H})_{\text{py}}$ .  $\delta_{\text{H}}$  (300 MHz; CDCl<sub>3</sub>; Me<sub>4</sub>Si): 0.90 (12H, t, <sup>3</sup>J 6.6, CH<sub>3</sub>), 1.31 (32H, m, CH<sub>2</sub>), 1.52 (8H, m, CH<sub>2</sub>), 1.85 (8H, qt, <sup>3</sup>J 6.9, CH<sub>2</sub>), 4.05 (8H, t, <sup>3</sup>J 6.8, OCH<sub>2</sub>), 6.42 (2H, t, <sup>4</sup>J 2.2, H<sub>p</sub>), 6.84 (2H, s, 4'-H), 7.05 (4H, d, <sup>4</sup>J 2.3, H<sub>o</sub>), 7.15 (2H, ddd, <sup>3</sup>J 7.3, 5.7, <sup>4</sup>J 1.2, 5-H), 7.54 (2H, d, <sup>3</sup>J 7.7, 3-H), 7.77 (2H, ddd, <sup>3</sup>J 7.3, 7.7, <sup>4</sup>J 1.3, 4-H), 10.34 (2H, d, <sup>3</sup>J 5.7, 6-H).

**[Pd(pz<sup>R(10,10)py</sup>)<sub>2</sub>] (12):** yellow solid (57%). Found: C, 69.7; H, 8.6; N, 7.2. PdC<sub>68</sub>N<sub>6</sub>H<sub>100</sub>O<sub>4</sub> requires C, 69.5; H, 8.3; N, 7.2%.  $\nu_{\max}/\text{cm}^{-1}$  1596s  $\nu(\text{C=C} + \text{C=N})$ , 766m  $\gamma(\text{C-H})_{\text{py}}$ .  $\delta_{\text{H}}$  (300 MHz; CDCl<sub>3</sub>; Me<sub>4</sub>Si): 0.88 (12H, t, <sup>3</sup>J 6.9, CH<sub>3</sub>), 1.28 (56H, m, CH<sub>2</sub>), 1.84 (8H, qt, <sup>3</sup>J 6.7, CH<sub>2</sub>), 4.05 (8H, t, <sup>3</sup>J 6.6, OCH<sub>2</sub>), 6.42 (2H, t, <sup>4</sup>J 2.2, H<sub>p</sub>), 6.87 (2H, s, 4'-H), 7.07 (4H, d, <sup>4</sup>J 2.2, H<sub>o</sub>), 7.21 (2H, ddd, <sup>3</sup>J 7.8, 5.5, <sup>4</sup>J 1.3, 5-H), 7.55 (2H, d, <sup>3</sup>J 7.7, 3-H), 7.79 (2H, ddd, <sup>3</sup>J 7.8, 7.7, <sup>4</sup>J 1.2, 4-H), 10.35 (2H, d, <sup>3</sup>J 5.5, 6-H).

**[Pd(pz<sup>R(14,14)py</sup>)<sub>2</sub>] (14):** yellow solid (66%). Found: C, 72.2; H, 9.5; N, 6.0. PdC<sub>84</sub>N<sub>6</sub>H<sub>132</sub>O<sub>4</sub> requires C, 71.8; H, 9.2; N, 6.0%.  $\nu_{\max}/\text{cm}^{-1}$  1598s  $\nu(\text{C=C} + \text{C=N})$ , 767m  $\gamma(\text{C-H})_{\text{py}}$ .  $\delta_{\text{H}}$  (300 MHz; CDCl<sub>3</sub>; Me<sub>4</sub>Si): 0.88 (12H, t, <sup>3</sup>J 6.9, CH<sub>3</sub>), 1.26 (88H, m, CH<sub>2</sub>), 1.84 (8H, qt, <sup>3</sup>J 6.6, CH<sub>2</sub>), 4.05 (8H, t, <sup>3</sup>J 6.5, OCH<sub>2</sub>), 6.42 (2H, t, <sup>4</sup>J 2.2, H<sub>p</sub>), 6.87 (2H, s, 4'-H), 7.07 (4H, d, <sup>4</sup>J 2.2, H<sub>o</sub>), 7.20 (2H, ddd, <sup>3</sup>J 7.8, 5.4, <sup>4</sup>J 1.3, 5-H), 7.55 (2H, d, <sup>3</sup>J 7.6, 3-H), 7.79 (2H, ddd, <sup>3</sup>J 7.8, 7.6, <sup>4</sup>J 1.2, 4-H), 10.34 (2H, d, <sup>3</sup>J 5.4, 6-H).

**[Pd(pz<sup>R(16,16)py</sup>)<sub>2</sub>] (15):** yellow solid (60%). Found: C, 73.2; H, 9.8; N, 5.6. PdC<sub>92</sub>N<sub>6</sub>H<sub>148</sub>O<sub>4</sub> requires C, 73.0; H, 9.4; N, 5.6%.  $\nu_{\max}/\text{cm}^{-1}$  1597s  $\nu(\text{C=C} + \text{C=N})$ , 766m  $\gamma(\text{C-H})_{\text{py}}$ .  $\delta_{\text{H}}$  (300 MHz; CDCl<sub>3</sub>; Me<sub>4</sub>Si): 0.87 (12H, t, <sup>3</sup>J 6.9, CH<sub>3</sub>), 1.25 (104H, m, CH<sub>2</sub>), 1.83 (8H, qt, <sup>3</sup>J 6.7, CH<sub>2</sub>), 4.05 (8H, t, <sup>3</sup>J 6.5, OCH<sub>2</sub>), 6.42 (2H, t, <sup>4</sup>J 2.2, H<sub>p</sub>), 6.90 (2H, s, 4'-H), 7.08 (4H, d, <sup>4</sup>J 2.2, H<sub>o</sub>), 7.23 (2H, ddd, <sup>3</sup>J 7.8, 5.6, <sup>4</sup>J 1.3, 5-H), 7.59 (2H, d, <sup>3</sup>J 7.6, 3-H), 7.84 (2H, ddd, <sup>3</sup>J 7.8, 7.6, <sup>4</sup>J 1.2, 4-H), 10.40 (2H, d, <sup>3</sup>J 5.6, 6-H).

**[Pd(pz<sup>R(18,18)py</sup>)<sub>2</sub>] (16):** yellow solid (54%). Found: C, 74.1; H, 10.2; N, 5.2. PdC<sub>100</sub>N<sub>6</sub>H<sub>164</sub>O<sub>4</sub> requires C, 73.6; H, 9.6; N, 5.2%.  $\nu_{\max}/\text{cm}^{-1}$  1596s  $\nu(\text{C=C} + \text{C=N})$ , 764m  $\gamma(\text{C-H})_{\text{py}}$ .  $\delta_{\text{H}}$  (300 MHz; CDCl<sub>3</sub>; Me<sub>4</sub>Si): 0.87 (12H, t, <sup>3</sup>J 6.8, CH<sub>3</sub>), 1.25 (120H, m, CH<sub>2</sub>), 1.83 (8H, qt, <sup>3</sup>J 6.7, CH<sub>2</sub>), 4.05 (8H, t, <sup>3</sup>J 6.5, OCH<sub>2</sub>), 6.43 (2H, t, <sup>4</sup>J 2.2, H<sub>p</sub>), 6.94 (2H, s, 4'-H), 7.10 (4H, d, <sup>4</sup>J 2.2, H<sub>o</sub>), 7.29 (2H, ddd, <sup>3</sup>J 7.8, 5.5, <sup>4</sup>J 1.3, 5-H), 7.64 (2H, d, <sup>3</sup>J 7.6, 3-H), 7.87 (2H, ddd, <sup>3</sup>J 7.8, 7.6, <sup>4</sup>J 1.2, 4-H), 10.45 (2H, d, <sup>3</sup>J 5.5, 6-H).

#### Characterisation of the complexes [PdCl<sub>2</sub>(Hpz<sup>R(n,n)py</sup>)] (R(n,n) = C<sub>6</sub>H<sub>3</sub>(OC<sub>n</sub>H<sub>2n+1</sub>)<sub>2</sub>; n = 4, 8, 10, 14, 16, 18) (17-24)

**[PdCl<sub>2</sub>(Hpz<sup>R(4,4)py</sup>)] (17):** pale orange solid (60%). Found: C, 47.6; H, 4.9; N, 7.5. PdC<sub>22</sub>N<sub>3</sub>H<sub>27</sub>O<sub>2</sub>Cl<sub>2</sub>·0.2CH<sub>2</sub>Cl<sub>2</sub> requires C, 47.8; H, 4.8; N, 7.7%.  $\nu_{\max}/\text{cm}^{-1}$  3187w  $\nu(\text{N-H})$ , 1596s  $\nu(\text{C=C} + \text{C=N})$ , 771m  $\gamma(\text{C-H})_{\text{py}}$ .  $\delta_{\text{H}}$  (300 MHz; CDCl<sub>3</sub>): 1.00 (6H, t, <sup>3</sup>J 7.0, CH<sub>3</sub>), 1.52 (4H, m, CH<sub>2</sub>), 1.77 (4H, qt, <sup>3</sup>J 6.7, CH<sub>2</sub>), 3.99 (4H, t, <sup>3</sup>J 6.4, OCH<sub>2</sub>), 5.30 (s, CH<sub>2</sub>Cl<sub>2</sub>), 6.52 (1H, t, <sup>4</sup>J 2.2, H<sub>p</sub>), 6.65 (2H, d, <sup>4</sup>J 2.2, H<sub>o</sub>), 7.07 (1H, s, 4'-H), 7.41 (1H, ddd, <sup>3</sup>J 7.7, 5.5, <sup>4</sup>J 1.3, 5-H), 7.89 (1H, d, <sup>3</sup>J 7.6, 3-H), 8.08 (1H, ddd, <sup>3</sup>J 7.7, 7.6, <sup>4</sup>J 1.4, 4-H), 9.01 (1H, d, <sup>3</sup>J 5.5, 6-H), 11.29 (1H, s, NH).

**[PdCl<sub>2</sub>(Hpz<sup>R(8,8)py</sup>)] (19):** pale orange solid (66%). Found: C, 54.0; H, 6.5; N, 6.3. PdC<sub>30</sub>N<sub>3</sub>H<sub>43</sub>O<sub>2</sub>Cl<sub>2</sub>·0.2CH<sub>2</sub>Cl<sub>2</sub> requires C, 53.6; H, 6.5; N, 6.4%.  $\nu_{\max}/\text{cm}^{-1}$  3191w  $\nu(\text{N-H})$ , 1600s  $\nu(\text{C=C} + \text{C=N})$ , 770m  $\gamma(\text{C-H})_{\text{py}}$ .  $\delta_{\text{H}}$  (300 MHz; CDCl<sub>3</sub>; Me<sub>4</sub>Si): 0.88 (6H, t, <sup>3</sup>J 6.7, CH<sub>3</sub>), 1.33 (16H, m, CH<sub>2</sub>), 1.46 (4H, m, CH<sub>2</sub>), 1.80 (4H, m, CH<sub>2</sub>), 3.97 (4H, t, <sup>3</sup>J 6.4, OCH<sub>2</sub>), 5.30 (s, CH<sub>2</sub>Cl<sub>2</sub>), 6.51 (1H, t, <sup>4</sup>J 2.1, H<sub>p</sub>), 6.65 (2H, d, <sup>4</sup>J 2.1, H<sub>o</sub>), 7.09 (1H, s, 4'-H), 7.40 (1H, ddd, <sup>3</sup>J 7.8, 5.6, <sup>4</sup>J 1.3, 5-H), 7.91 (1H, d, <sup>3</sup>J 7.8, 3-H), 8.07 (1H, ddd, <sup>3</sup>J 7.8, 7.6, <sup>4</sup>J 1.2, 4-H), 8.97 (1H, d, <sup>3</sup>J 5.6, 6-H), 11.34 (1H, s, NH).

**[PdCl<sub>2</sub>(Hpz<sup>R(10,10)</sup>py)] (20):** pale orange solid (66%). Found: C, 57.4; H, 7.2; N, 5.9. PdC<sub>34</sub>N<sub>3</sub>H<sub>51</sub>O<sub>2</sub>Cl<sub>2</sub> requires C, 57.6; H, 7.0; N, 6.0%.  $\nu_{\max}/\text{cm}^{-1}$  3188w  $\nu(\text{N-H})$ , 1596s  $\nu(\text{C=C} + \text{C=N})$ , 772m  $\gamma(\text{C-H})_{\text{py}}$ .  $\delta_{\text{H}}$  (300 MHz; CDCl<sub>3</sub>; Me<sub>4</sub>Si): 0.88 (6H, t, <sup>3</sup>J 6.5, CH<sub>3</sub>), 1.27 (24H, m, CH<sub>2</sub>), 1.46 (4H, m, CH<sub>2</sub>), 1.79 (4H, m, CH<sub>2</sub>), 3.96 (4H, t, <sup>3</sup>J 6.7, OCH<sub>2</sub>), 6.53 (1H, t, <sup>4</sup>J 2.1, H<sub>p</sub>), 6.65 (2H, d, <sup>4</sup>J 2.1, H<sub>o</sub>), 7.06 (1H, s, 4'-H), 7.41 (1H, ddd, <sup>3</sup>J 7.8, 5.4, <sup>4</sup>J 1.3, 5-H), 7.89 (1H, d, <sup>3</sup>J 7.8, 3-H), 8.07 (1H, ddd, <sup>3</sup>J 7.8, 7.6, <sup>4</sup>J 1.3, 4-H), 9.02 (1H, d, <sup>3</sup>J 5.4, 6-H), 11.22 (1H, s, NH).

**[PdCl<sub>2</sub>(Hpz<sup>R(14,14)</sup>py)] (22):** pale orange solid (67%). Found: C, 61.3; H, 8.2; N, 5.1. PdC<sub>42</sub>N<sub>3</sub>H<sub>67</sub>O<sub>2</sub>Cl<sub>2</sub> requires C, 61.3; H, 7.9; N, 5.2%.  $\nu_{\max}/\text{cm}^{-1}$  3185w  $\nu(\text{N-H})$ , 1596s  $\nu(\text{C=C} + \text{C=N})$ , 772m  $\gamma(\text{C-H})_{\text{py}}$ .  $\delta_{\text{H}}$  (300 MHz; CDCl<sub>3</sub>; Me<sub>4</sub>Si): 0.87 (6H, t, <sup>3</sup>J 6.5, CH<sub>3</sub>), 1.26 (40H, m, CH<sub>2</sub>), 1.44 (4H, m, CH<sub>2</sub>), 1.79 (4H, qt, <sup>3</sup>J 6.7, CH<sub>2</sub>), 3.97 (4H, t, <sup>3</sup>J 6.8, OCH<sub>2</sub>), 6.53 (1H, t, <sup>4</sup>J 2.1, H<sub>p</sub>), 6.64 (2H, d, <sup>4</sup>J 2.1, H<sub>o</sub>), 7.06 (1H, s, 4'-H), 7.43 (1H, ddd, <sup>3</sup>J 7.7, 5.7, <sup>4</sup>J 1.3, 5-H), 7.88 (1H, d, <sup>3</sup>J 7.7, 3-H), 8.08 (1H, ddd, <sup>3</sup>J 7.7, 7.6, <sup>4</sup>J 1.2, 4-H), 9.03 (1H, d, <sup>3</sup>J 5.7, 6-H), 11.11 (1H, s, NH).

**[PdCl<sub>2</sub>(Hpz<sup>R(16,16)</sup>py)] (23):** pale orange solid (73%). Found: C, 62.8; H, 8.6; N, 4.8. PdC<sub>46</sub>N<sub>3</sub>H<sub>75</sub>O<sub>2</sub>Cl<sub>2</sub> requires C, 63.2; H, 8.4; N, 4.5%.  $\nu_{\max}/\text{cm}^{-1}$  3195w  $\nu(\text{N-H})$ , 1597s  $\nu(\text{C=C} + \text{C=N})$ , 773m  $\gamma(\text{C-H})_{\text{py}}$ .  $\delta_{\text{H}}$  (300 MHz; CDCl<sub>3</sub>; Me<sub>4</sub>Si): 0.87 (6H, t, <sup>3</sup>J 6.7, CH<sub>3</sub>), 1.25 (48H, m, CH<sub>2</sub>), 1.46 (4H, m, CH<sub>2</sub>), 1.78 (4H, m, CH<sub>2</sub>), 3.97 (4H, t, <sup>3</sup>J 6.7, OCH<sub>2</sub>), 6.53 (1H, t, <sup>4</sup>J 2.2, H<sub>p</sub>), 6.65 (2H, d, <sup>4</sup>J 2.2, H<sub>o</sub>), 7.05 (1H, s, 4'-H), 7.43 (1H, ddd, <sup>3</sup>J 7.7, 5.6, <sup>4</sup>J 1.3, 5-H), 7.86 (1H, d, <sup>3</sup>J 7.7, 3-H), 8.07 (1H, ddd, <sup>3</sup>J 7.7, 7.7, <sup>4</sup>J 1.3, 4-H), 9.06 (1H, d, <sup>3</sup>J 5.6, 6-H), 11.19 (1H, s, NH).

**[PdCl<sub>2</sub>(Hpz<sup>R(18,18)</sup>py)] (24):** pale orange solid (52%). Found: C, 64.2; H, 8.9; N, 4.5. PdC<sub>50</sub>N<sub>3</sub>H<sub>83</sub>O<sub>2</sub>Cl<sub>2</sub> requires C, 64.1; H, 8.7; N, 4.2%.  $\nu_{\max}/\text{cm}^{-1}$  3188w  $\nu(\text{N-H})$ , 1598s  $\nu(\text{C=C} + \text{C=N})$ , 772m  $\gamma(\text{C-H})_{\text{py}}$ .  $\delta_{\text{H}}$  (300 MHz; CDCl<sub>3</sub>; Me<sub>4</sub>Si): 0.87 (6H, t, <sup>3</sup>J 6.6, CH<sub>3</sub>), 1.25 (56H, m, CH<sub>2</sub>), 1.46 (4H, m, CH<sub>2</sub>), 1.80 (4H, m, CH<sub>2</sub>), 3.95 (4H, t, <sup>3</sup>J 6.6, OCH<sub>2</sub>), 6.54 (1H, t, <sup>4</sup>J 2.1, H<sub>p</sub>), 6.67 (2H, d, <sup>4</sup>J 2.1, H<sub>o</sub>), 7.00 (1H, s, 4'-H), 7.45 (1H, ddd, <sup>3</sup>J 7.7, 5.4, <sup>4</sup>J 1.2, 5-H), 7.83 (1H, d, <sup>3</sup>J 7.7, 3-H), 8.06 (1H, ddd, <sup>3</sup>J 7.7, 7.8, <sup>4</sup>J 1.3, 4-H), 9.12 (1H, d, <sup>3</sup>J 5.4, 6-H), 11.34 (1H, s, NH).

**Table S1.** Selected bond distances (Å) and angles (°) for [Hpz<sup>R(4,4)</sup>py]<sub>2</sub> **1**

|          |          |               |          |
|----------|----------|---------------|----------|
| N1 – N2  | 1.351(2) | N1 – N2 – C3  | 104.5(2) |
| N1 – C5  | 1.337(3) | N2 – C3 – C4  | 110.0(2) |
| N2 – C3  | 1.334(3) | C3 – C4 – C5  | 106.7(2) |
| C3 – C4  | 1.345(3) | N1 – C5 – C4  | 105.7(2) |
| C4 – C5  | 1.357(3) | N2 – N1 – C5  | 113.1(2) |
| C5 – C6  | 1.468(3) | C4 – C5 – C6  | 134.0(2) |
| C6 – C7  | 1.372(3) | N1 – C5 – C6  | 120.2(2) |
| C7 – C8  | 1.372(3) | C4 – C3 – C11 | 129.8(3) |
| C8 – C9  | 1.360(4) | N2 – C3 – C11 | 120.2(2) |
| C9 – C10 | 1.367(4) |               |          |
| N3 – C10 | 1.329(3) |               |          |
| C3 – C11 | 1.470(3) |               |          |

**Table S2.** Selected bond distances (Å) and angles (°) for [Pd(pz<sup>R(10,10)</sup>py)<sub>2</sub>] **12**

|         |          |                            |          |
|---------|----------|----------------------------|----------|
| Pd – N1 | 1.929(7) | N1 – Pd – N3               | 78.5(4)  |
| Pd – N3 | 2.041(7) | N1 – Pd – N3' <sup>a</sup> | 101.5(4) |
| N1 – N2 | 1.361(8) |                            |          |
| N2 – C3 | 1.374(8) |                            |          |
| C3 – C4 | 1.370(9) |                            |          |
| C4 – C5 | 1.36(2)  |                            |          |
| N1 – C5 | 1.366(9) |                            |          |

<sup>a</sup>  $-x + 1, -y + 1, -z + 1$

**Fig. S1.** DSC deconvolution of the pyrazole ligand [Hpz<sup>R(16,16)py</sup>] **7** showing the temperatures of the solid-mesophase (84.4 °C) and mesophase-isotrope (87.4 °C).

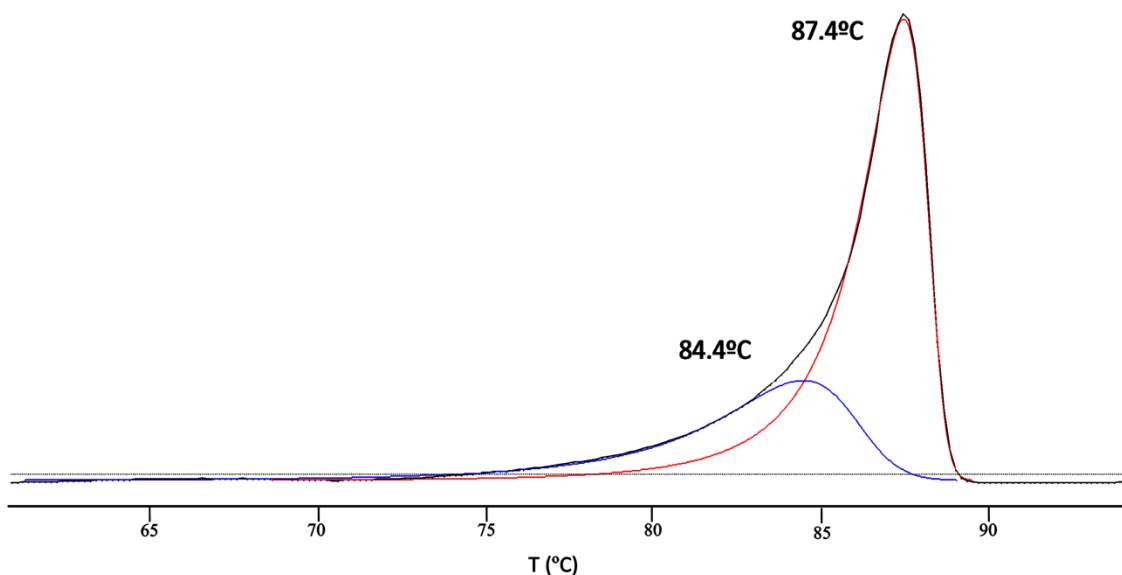

**Fig. S2.** PLUTO plot for [PdCl<sub>2</sub>(Hpz<sup>R(4,4)py</sup>)] **17**. Hydrogen atoms have been omitted for clarity. Unit cell dimensions (distances in Å and angles in degrees):  $a = 8.7556(4)$ ;  $b = 15.2818(15)$ ;  $c = 17.4874(17)$ ;  $\alpha = 95.186(8)$ ;  $\beta = 90.035(6)$ ;  $\gamma = 95.510(6)$ .

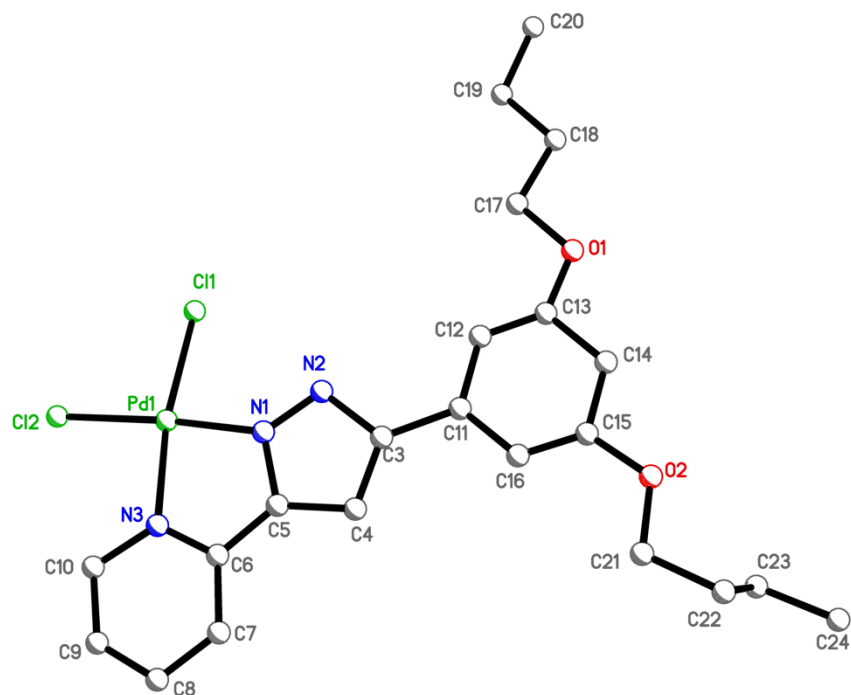

Supplement: c4dt00369a1.pdf [file c4dt00369a1.pdf]
